# Supplementary material for: Building a spontaneously formed and self-healing protective layer with an F-rich electrochemically active organic molecule for ultra-stable Li metal batteries
Source: Royal Society of Chemistry journal article supplement (doi:10.1039/d1se01161h), 2021-01-01
Supplement: d1se01161h1.pdf [file d1se01161h1.pdf]

## Supplementary Information

### Building a Spontaneously Formed and Self-healing Protective Layer with a F-rich Electrochemically Active Organic Molecule for Ultra-stable Li Metal Batteries

Zeyi Yao<sup>1</sup>, Jinzhao Fu<sup>1</sup>, Yangtao Liu<sup>1</sup>, Jiahui Hou<sup>1</sup>, Panawan Vanaphuti<sup>1</sup>, Xiaotu Ma<sup>1</sup>,  
Ruihan Zhang<sup>1</sup>, Zhenzhen Yang<sup>2</sup> and Yan Wang<sup>1</sup>\*

1. Department of Mechanical Engineering, Worcester Polytechnic Institute, 100 Institute Road, Worcester, MA 01609, USA
2. Chemical Sciences and Engineering Division, Argonne National Laboratory, 9700 S Cass Ave, Lemont, IL 60439

\*Correspondence: [yanwang@wpi.edu](mailto:yanwang@wpi.edu) (Y.W.)

#### Calculation method

To evaluate the amount of TFBQ on the cathode side, we applied the initial discharge (reduction from TFBQ to LTFBB, 60 mAh/g) specific capacity of the Super P electrode to do the calculation.

The total amount of TFBQ in one coin cell is  $0.1 \text{ mol/L} * 50 \text{ }\mu\text{L} = 5 \text{ }\mu\text{mol}$ .

The loading of Super P in the electrode we applied: about 0.6 mg. So the total capacity is  $0.6 \text{ mg} * 60 \text{ mAh/g} = 36 \text{ }\mu\text{Ah} = 0.1296 \text{ Coulombs}$ , which need 1.343  $\mu\text{mol}$  electrons.

Each TFBQ can deliver 2 electrons, so the reaction consumes 0.6715  $\mu\text{mol}$  of TFBQ.

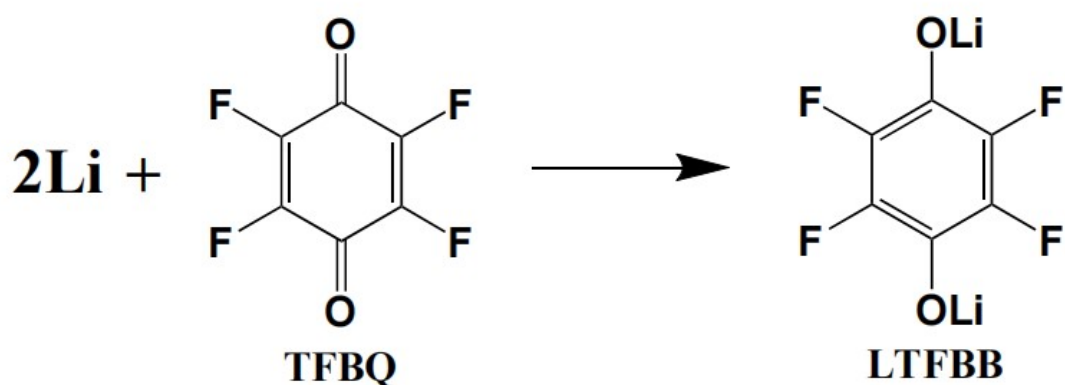

**Figure S1.** Mechanism of TFBQ reaction on Li metal surface.

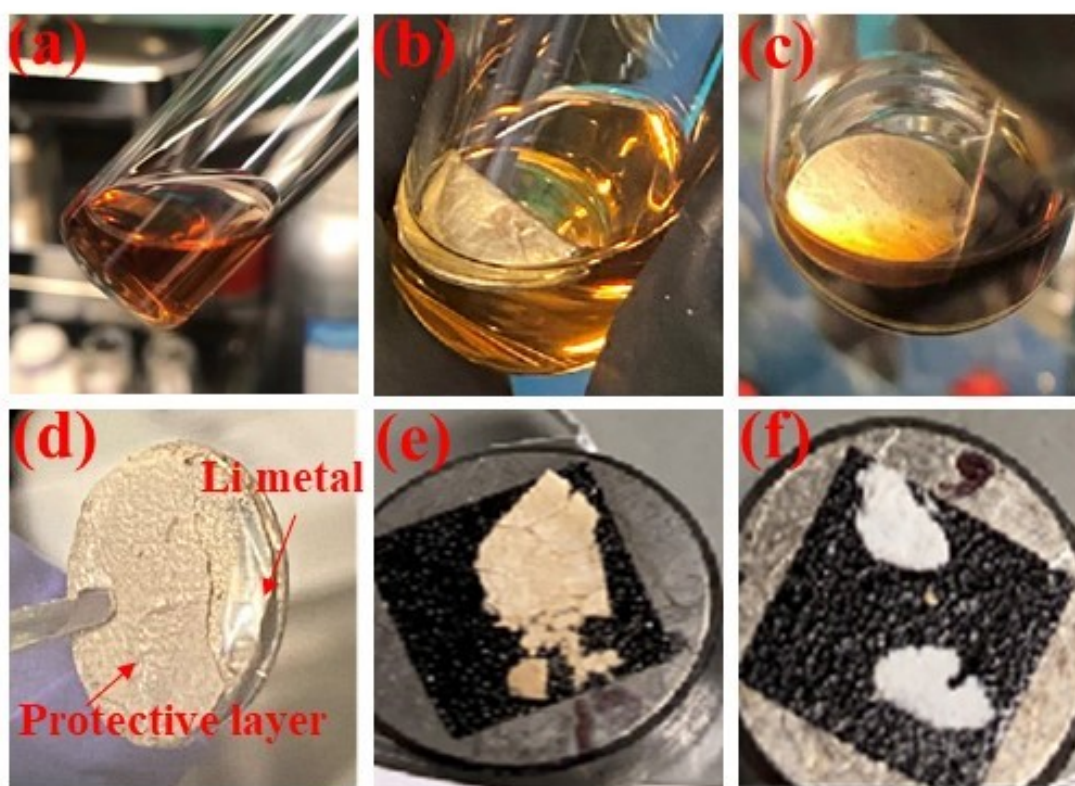

**Figure S2.** Images of original 0.1 M TFBQ in LDD electrolyte (a) and a Li chip immersed in the same electrolyte for 14 days (b). A control test of Li chip immersed in 0.1 M BQ for one day (c). Li metal section after cycling in 0.1 M TFBQ LDD electrolyte (d). The collected interphase from cycled Li metal with 0.1 M TFBQ LDD electrolyte (e) and LDD electrolyte (f) after 3 days.

**Table S1.** XPS data for element concentration corrected by relative sensitivity factors (RSF).

|                 | Li 1s | C 1s  | O 1s  | F 1s  | S 1s | Fe 2p3 | P 1s |
|-----------------|-------|-------|-------|-------|------|--------|------|
| Li chip for A   | 32.7  | 15.14 | 33.43 | 17.64 | 0.02 | -      | 1.08 |
| Li chip for B   | 45.72 | 4.64  | 7.33  | 40.37 | -    | -      | 1.93 |
| Li chip for C   | 58.63 | 20.07 | 18.33 | 2.94  | 0.03 | -      | -    |
| Li chip for E   | 33.88 | 18.3  | 11.45 | 33.59 | 2.78 | -      | -    |
| Electrode for C | 17.82 | 41.13 | 16.46 | 21.98 | 0.5  | 2.11   | -    |
| Electrode for D | 37.66 | 22.83 | 12.46 | 23.24 | 1.61 | 2.21   | -    |
| Electrode for F | 27.23 | 46.44 | 15.59 | 6.73  | 2.48 | 1.54   | -    |

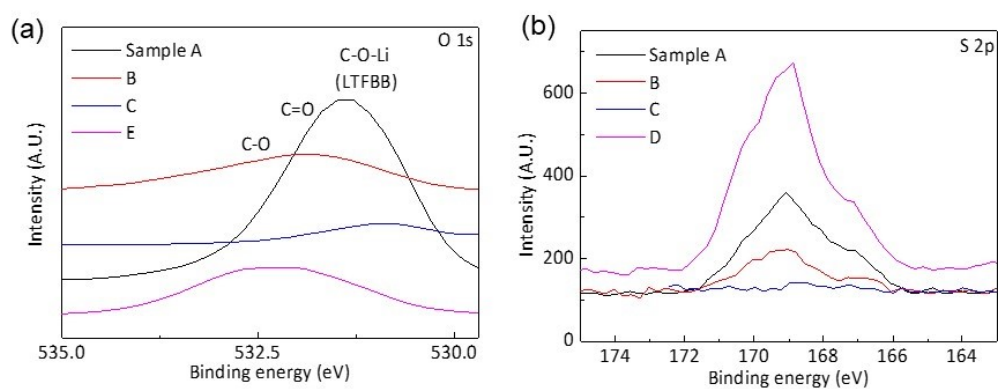

**Figure S3.** The XPS spectra of O 1s (a) and S 2p (b) for sample A, B, C and E.

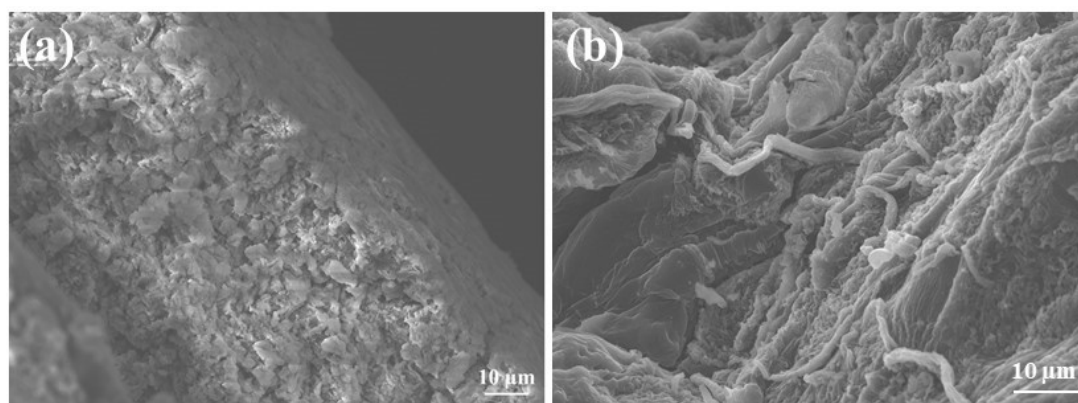

**Figure S4.** The cross-section of interface for cycled Li metal (a) and a specific area with Li dendrites (b).

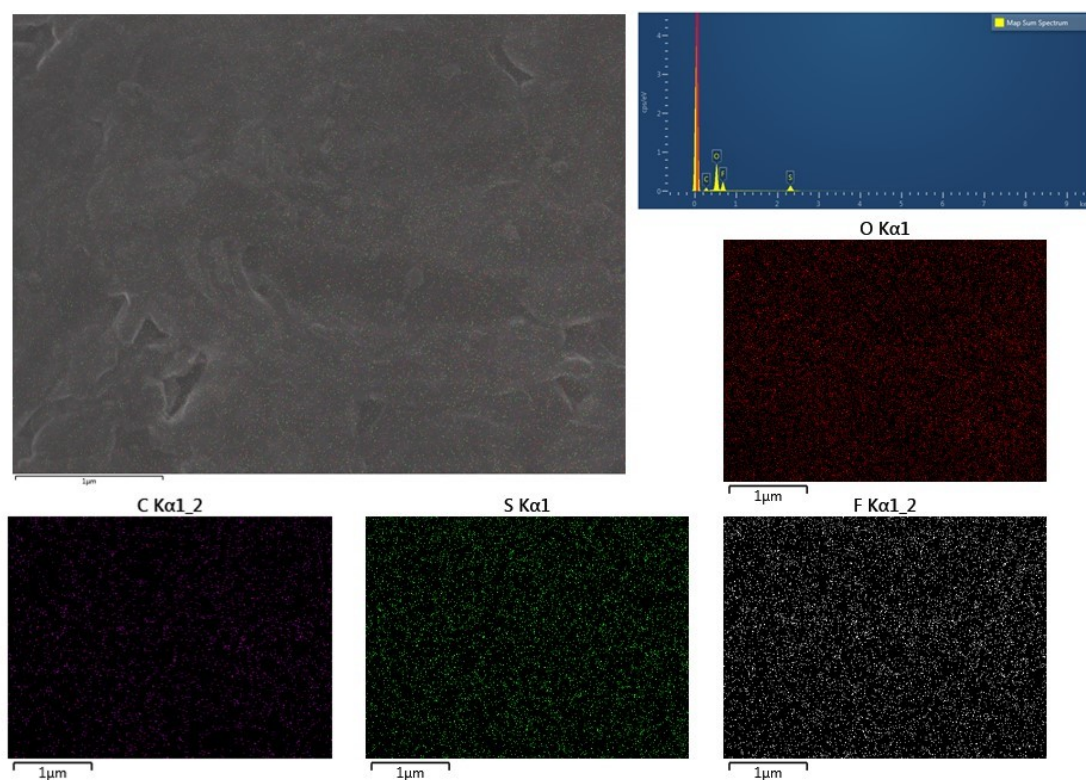

**Figure S5.** Multi-element EDX mapping for the protective layer in sample E.

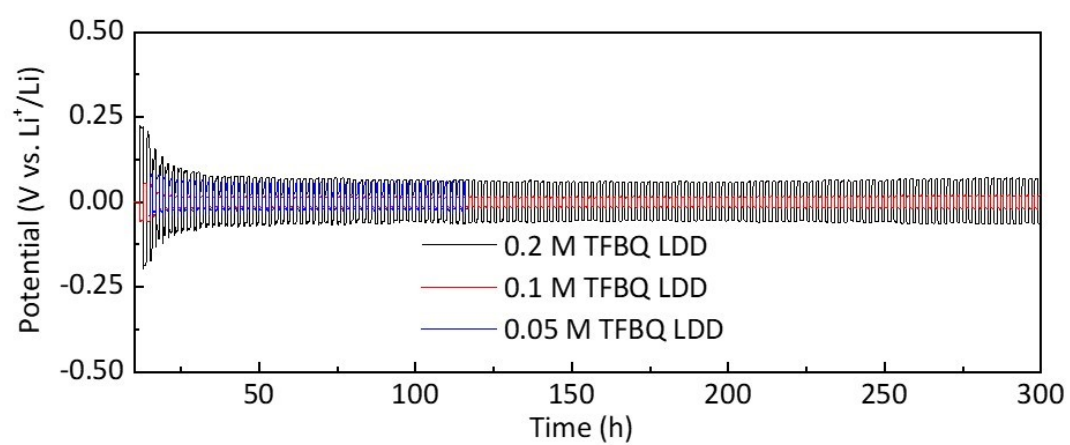

**Figure S6.** Li-Li symmetric cells with 0.05, 0.1 and 0.2 M TFBQ LDD electrolyte.

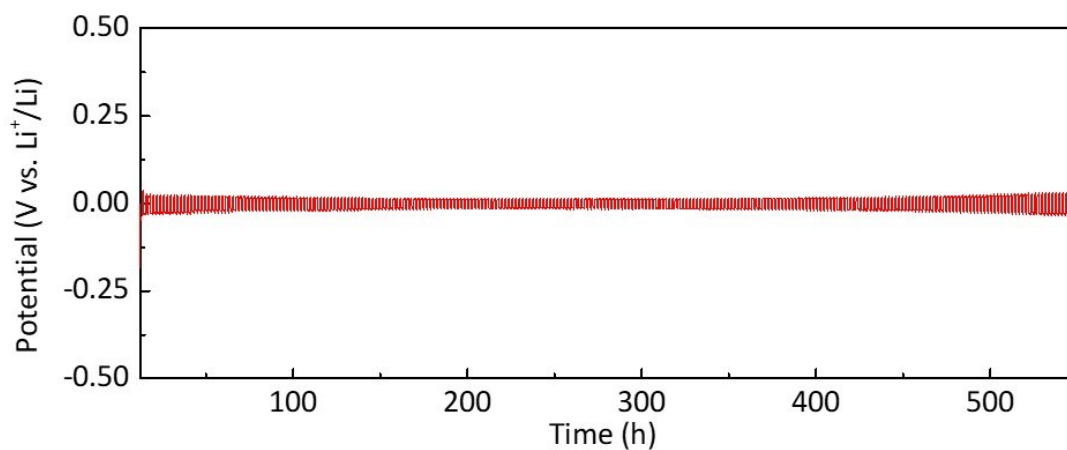

**Figure S7.** Li-Li symmetric cell with 0.1 M TFBQ LDD electrolyte for 175  $\mu\text{m}$  Li chips.

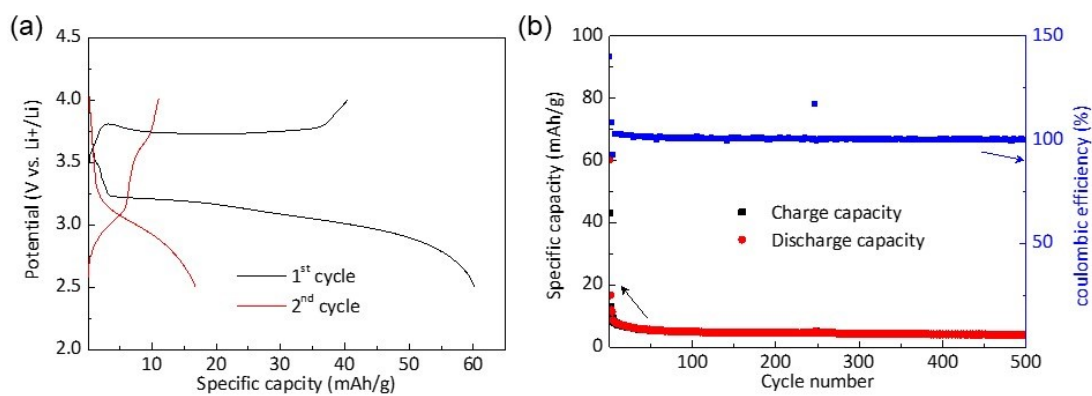

**Figure S8.** Charge/discharge curves (a) and cycle performance (b) of neat Super P in 0.1 M TFBQ LDD electrolyte.

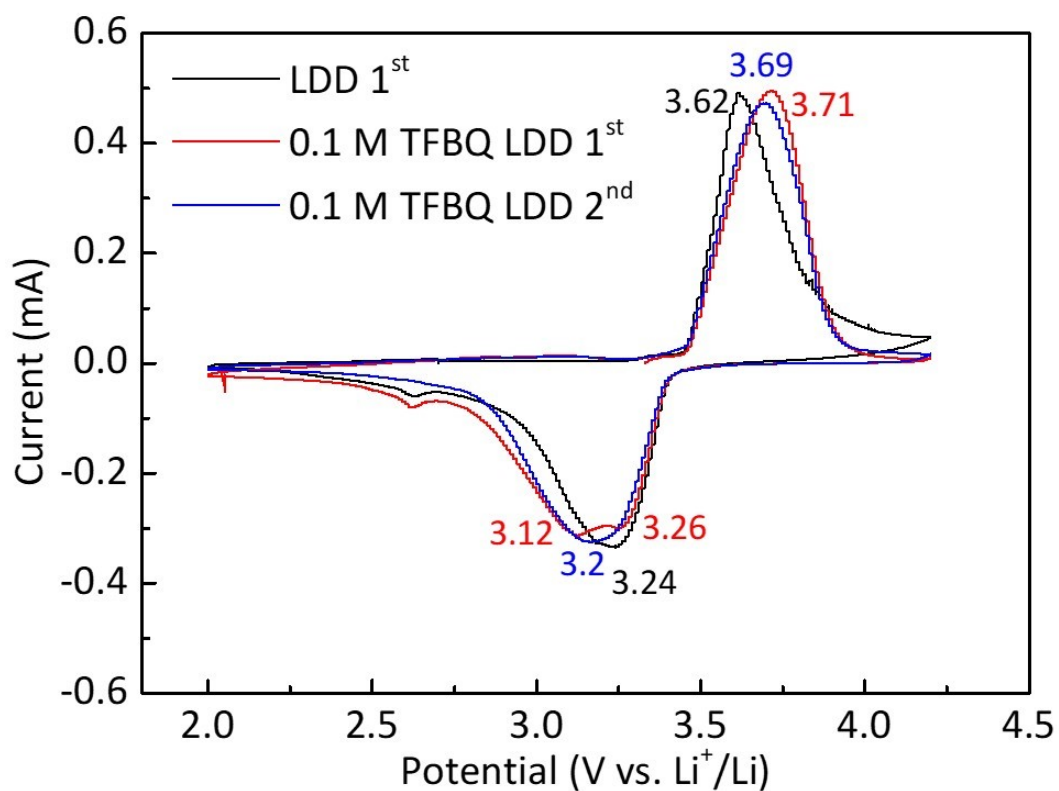

**Figure S9.** CV test for Li-LFP cells with LDD and 0.1 M TFBQ LDD electrolyte.

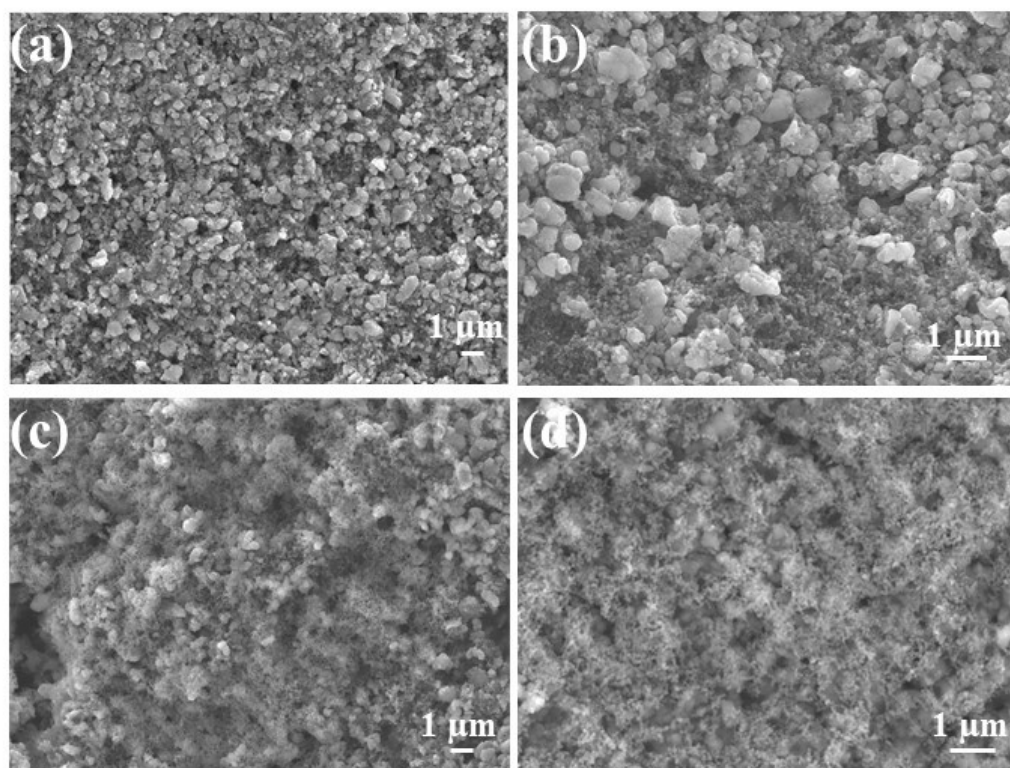

**Figure S10.** Surface morphology of LFP electrode before test (a), after 200 cycles under 1 C in LDD electrolyte (b), after formation (c) and after 600 cycles (d) in 0.1 M TFBQ LDD electrolyte.

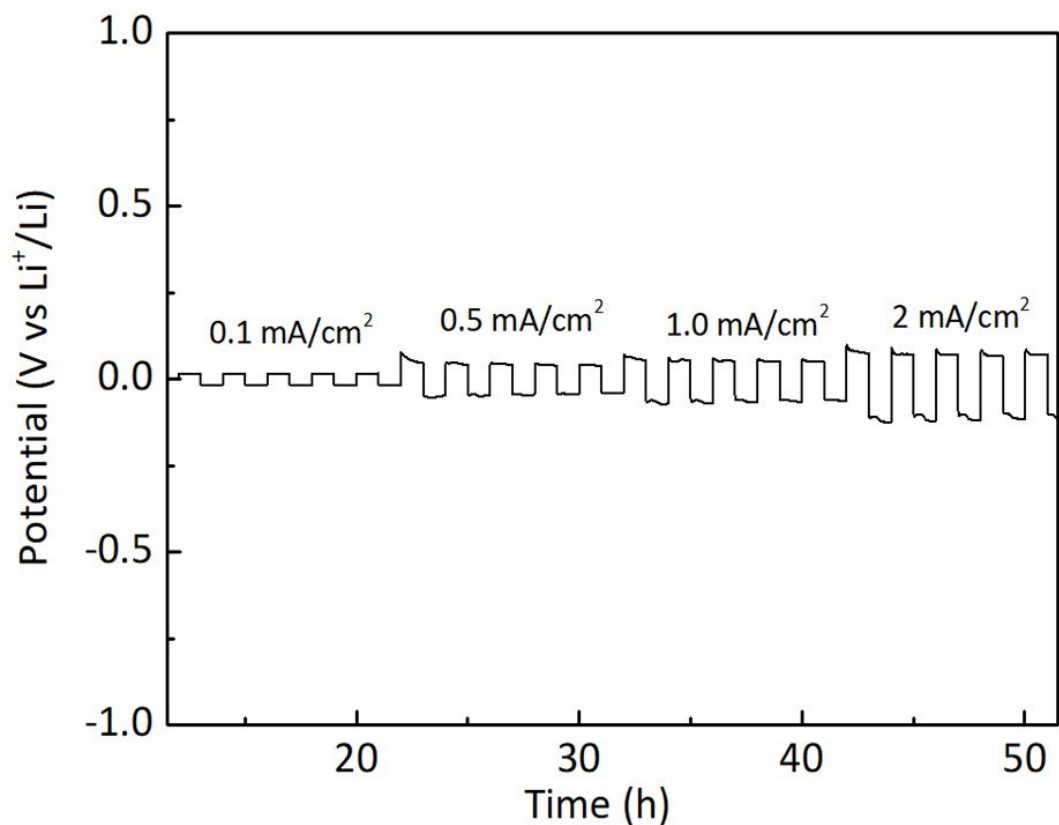

Figure S11. Rate performance for Li-Li symmetric cell with LDD electrolyte.

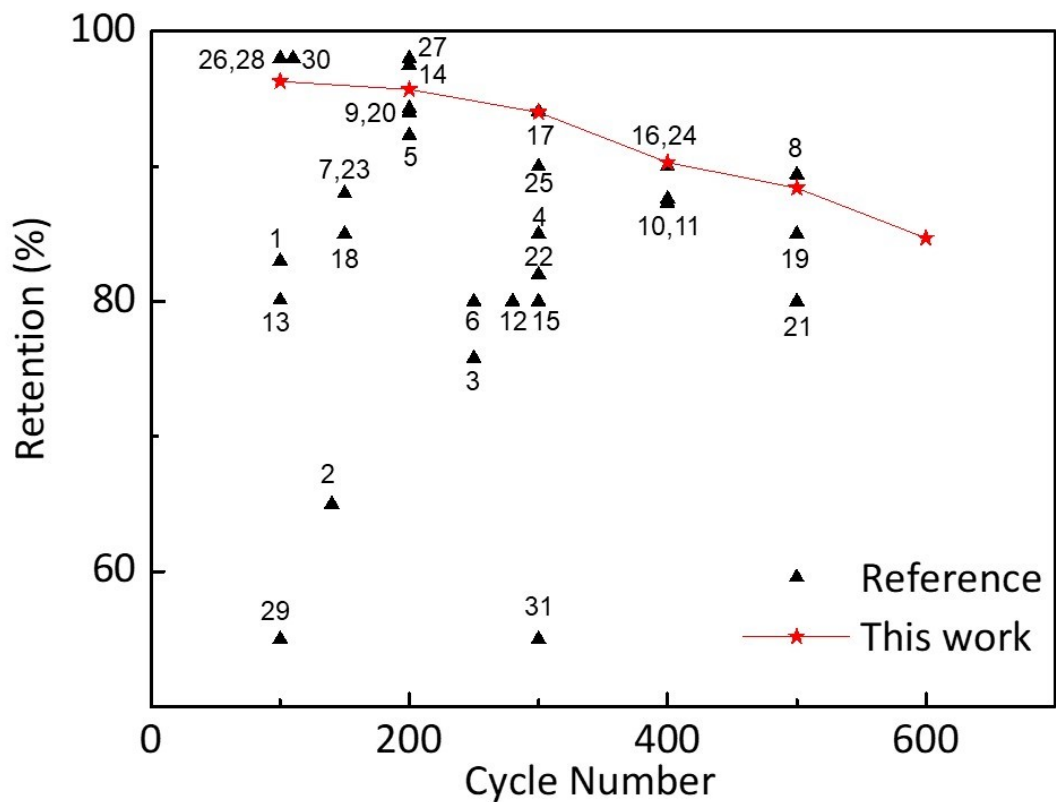

Figure S12. Specific energy delivered for Li-LFP battery reported.

Table S2. Comparison of the cycle performance for recent Li-LFP full cells.

| Reference | Cycle number                | Retention (%)                     | Current density                      | Journal                      |
|-----------|-----------------------------|-----------------------------------|--------------------------------------|------------------------------|
| This work | 100/200/300/<br>400/500/600 | 96.3/95.7/94.0/<br>90.3/88.4/84.7 | 1 C                                  | This work                    |
| 1         | 100                         | 83                                | 0.25 C                               | <i>Adv. Energy Mater.</i>    |
| 2         | 140                         | 65                                | 1 C                                  | <i>Adv. Mater.</i>           |
| 3         | 250                         | 75.8                              | 1 C                                  | <i>Adv. Funct. Mater.</i>    |
| 4         | 300                         | 85                                | 1 C                                  | <i>Adv. Funct. Mater.</i>    |
| 5         | 200                         | 92.3                              | 0.5 C                                | <i>Adv. Mater.</i>           |
| 6         | 250                         | 80                                | 0.5 C                                | <i>Adv. Funct. Mater.</i>    |
| 7         | 150                         | 88                                | 0.5 C                                | <i>Energy Storage Mater.</i> |
| 8         | 500                         | 89.4                              | 0.5 C                                | <i>ACS Energy Lett.</i>      |
| 9         | 200                         | 94                                | 0.2 C                                | <i>Nano Energy</i>           |
| 10        | 400                         | 87.6                              | 1 C                                  | <i>Energy Storage Mater.</i> |
| 11        | 400                         | 87.3                              | 0.5 C                                | <i>Nano Energy</i>           |
| 12        | 280                         | 80                                | 0.2 C                                | <i>Angew. Chem. Int. Ed.</i> |
| 13        | 100                         | 80.1                              | 1 C                                  | <i>Adv. Energy Mater.</i>    |
| 14        | 200                         | 97.5                              | 0.5 C                                | <i>Adv. Mater.</i>           |
| 15        | 300                         | 80                                | 0.5 C                                | <i>Adv. Mater.</i>           |
| 16        | 400                         | 90                                | 0.5 C                                | <i>Joule</i>                 |
| 17        | 300                         | 94.08                             | 1 C                                  | <i>Energy Storage Mater.</i> |
| 18        | 150                         | 85                                | 0.5 C                                | <i>Adv. Funct. Mater.</i>    |
| 19        | 500                         | 85                                | 0.5 C                                | <i>Energy Storage Mater.</i> |
| 20        | 200                         | 94.3                              | 0.5 C                                | <i>Adv. Energy Mater.</i>    |
| 21        | 500                         | 80                                | 0.5 C                                | <i>Nat. Commun.</i>          |
| 22        | 300                         | 82                                | 1 C                                  | <i>Nat. Commun.</i>          |
| 23        | 150                         | 88                                | 0.5 C                                | <i>Nat. Commun.</i>          |
| 24        | 400                         | 90                                | 0.079 C charge/<br>0.263 C discharge | <i>Nat. Energy.</i>          |
| 25        | 300                         | 90                                | 0.2 C charge/<br>0.6 C discharge     | <i>Adv. Funct. Mater.</i>    |
| 26        | 100                         | 98                                | 1 C                                  | <i>Nano Energy</i>           |
| 27        | 200                         | 98                                | 0.2 C                                | <i>J. Am. Chem. Soc.</i>     |
| 28        | 100                         | 98                                | 1 C                                  | <i>Angew. Chem. Int. Ed.</i> |
| 29        | 100                         | 55                                | 0.33 C                               | <i>Adv. Mater.</i>           |
| 30        | 110                         | 98.9                              | -                                    | <i>Adv. Mater.</i>           |
| 31        | 300                         | 55                                | 0.5 C                                | <i>Adv. Mater.</i>           |

Reference



- 1 F. Qiu, X. Li, H. Deng, D. Wang, X. Mu, P. He and H. Zhou, *Adv. Energy Mater.*, , DOI:10.1002/aenm.201803372.
- 2 D. J. Yoo, A. Elabd, S. Choi, Y. Cho, J. Kim, S. J. Lee, S. H. Choi, T. woo Kwon, K. Char, K. J. Kim, A. Coskun and J. W. Choi, *Adv. Mater.*, 2019, **31**, 1–10.
- 3 K. Lin, X. Qin, M. Liu, X. Xu, G. Liang, J. Wu, F. Kang, G. Chen and B. Li, *Adv. Funct. Mater.*, , DOI:10.1002/adfm.201903229.
- 4 Y. Cui, S. Liu, D. Wang, X. Wang, X. Xia, C. Gu and J. Tu, *Adv. Funct. Mater.*, , DOI:10.1002/adfm.202006380.
- 5 Y. Sun, Y. Zhao, J. Wang, J. Liang, C. Wang, Q. Sun, X. Lin, K. R. Adair, J. Luo, D. Wang, R. Li, M. Cai, T. K. Sham and X. Sun, *Adv. Mater.*, 2019, **31**, 1–9.
- 6 R. Xu, X. Q. Zhang, X. B. Cheng, H. J. Peng, C. Z. Zhao, C. Yan and J. Q. Huang, *Adv. Funct. Mater.*, , DOI:10.1002/adfm.201705838.
- 7 K. Liu, Z. Li, W. Xie, J. Li, D. Rao, M. Shao, B. Zhang and M. Wei, *Energy Storage Mater.*, 2018, **15**, 308–314.
- 8 Y. Zhao, G. Li, Y. Gao, D. Wang, Q. Huang and D. Wang, *ACS Energy Lett.*, 2019, **4**, 1271–1278.
- 9 C. Y. Wang, Z. J. Zheng, Y. Q. Feng, H. Ye, F. F. Cao and Z. P. Guo, *Nano Energy*, 2020, **74**, 104817.
- 10 J. Li, P. Zou, S. W. Chiang, W. Yao, Y. Wang, P. Liu, C. Liang, F. Kang and C. Yang, *Energy Storage Mater.*, 2020, **24**, 700–706.
- 11 Y. Zhao, D. Wang, Y. Gao, T. Chen, Q. Huang and D. Wang, *Nano Energy*, 2019, **64**, 103893.
- 12 H. Ye, Z. J. Zheng, H. R. Yao, S. C. Liu, T. T. Zuo, X. W. Wu, Y. X. Yin, N. W. Li, J. J. Gu, F. F. Cao and Y. G. Guo, *Angew. Chemie - Int. Ed.*, 2019, **58**, 1094–1099.
- 13 X. R. Chen, B. Q. Li, C. Zhu, R. Zhang, X. B. Cheng, J. Q. Huang and Q. Zhang, *Adv. Energy Mater.*, , DOI:10.1002/aenm.201901932.
- 14 J. Wu, Z. Rao, X. Liu, Y. Shen, C. Fang, L. Yuan, Z. Li, W. Zhang, X. Xie and Y. Huang, *Adv. Mater.*, 2021, **33**, 1–9.
- 15 T. T. Zuo, X. W. Wu, C. P. Yang, Y. X. Yin, H. Ye, N. W. Li and Y. G. Guo, *Adv. Mater.*, 2017, **29**, 1–6.
- 16 H. Chen, A. Pei, J. Wan, D. Lin, R. Vilá, H. Wang, D. Mackanic, H. G. Steinrück, W. Huang, Y. Li, A. Yang, J. Xie, Y. Wu, H. Wang and Y. Cui, *Joule*, 2020, **4**, 938–952.
- 17 Q. Wang, C. Yang, J. J. Yang, K. Wu, L. Qi, H. Tang, Z. Zhang, W. Liu and H. Zhou, *Energy Storage Mater.*, 2018, **15**, 249–256.
- 18 M. H. Ryou, Y. M. Lee, Y. Lee, M. Winter and P. Bieker, *Adv. Funct. Mater.*, 2015, **25**, 834–841.
- 19 W. Lu, L. Sun, Y. Zhao, T. Wu, L. Cong, J. Liu, Y. Liu and H. Xie, *Energy Storage Mater.*, 2021, **34**, 241–249.
- 20 J. Luo, C. C. Fang and N. L. Wu, *Adv. Energy Mater.*, , DOI:10.1002/aenm.201701482.

- 21 F. Zhou, Z. Li, Y. Y. Lu, B. Shen, Y. Guan, X. X. Wang, Y. C. Yin, B. S. Zhu, L. L. Lu, Y. Ni, Y. Cui, H. Bin Yao and S. H. Yu, *Nat. Commun.*, 2019, **10**, 1–11.
- 22 X. Shen, Y. Li, T. Qian, J. Liu, J. Zhou, C. Yan and J. B. Goodenough, *Nat. Commun.*, , DOI:10.1038/s41467-019-08767-0.
- 23 S. Choudhury, R. Mangal, A. Agrawal and L. A. Archer, *Nat. Commun.*, 2015, **6**, 1–9.
- 24 G. Li, Z. Liu, Q. Huang, Y. Gao, M. Regula, D. Wang, L. Q. Chen and D. Wang, *Nat. Energy*, 2018, **3**, 1076–1083.
- 25 Z. Jiang, Z. Zeng, X. Liang, L. Yang, W. Hu, C. Zhang, Z. Han, J. Feng and J. Xie, *Adv. Funct. Mater.*, , DOI:10.1002/adfm.202005991.
- 26 Y. Jiang, J. Jiang, Z. Wang, M. Han, X. Liu, J. Yi, B. Zhao, X. Sun and J. Zhang, *Nano Energy*, 2020, **70**, 104504.
- 27 H. Duan, J. Zhang, X. Chen, X. D. Zhang, J. Y. Li, L. B. Huang, X. Zhang, J. L. Shi, Y. X. Yin, Q. Zhang, Y. G. Guo, L. Jiang and L. J. Wan, *J. Am. Chem. Soc.*, 2018, **140**, 18051–18057.
- 28 Y. Zhang, Y. Zhong, Z. Wu, B. Wang, S. Liang and H. Wang, *Angew. Chemie - Int. Ed.*, 2020, **59**, 7797–7802.
- 29 L. Dong, L. Nie and W. Liu, *Adv. Mater.*, 2020, **32**, 1–8.
- 30 C. Cui, C. Yang, N. Eidson, J. Chen, F. Han, L. Chen, C. Luo, P. F. Wang, X. Fan and C. Wang, *Adv. Mater.*, 2020, **32**, 1–9.
- 31 C. Zhang, R. Lyu, W. Lv, H. Li, W. Jiang, J. Li, S. Gu, G. Zhou, Z. Huang, Y. Zhang, J. Wu, Q. H. Yang and F. Kang, *Adv. Mater.*, 2019, **31**, 1–9.
